# Supplementary material
Source: publisher figshare collection journal article supplement (https://karger.figshare.com/articles/dataset/_/16782769)

# Supplementary Figure S1

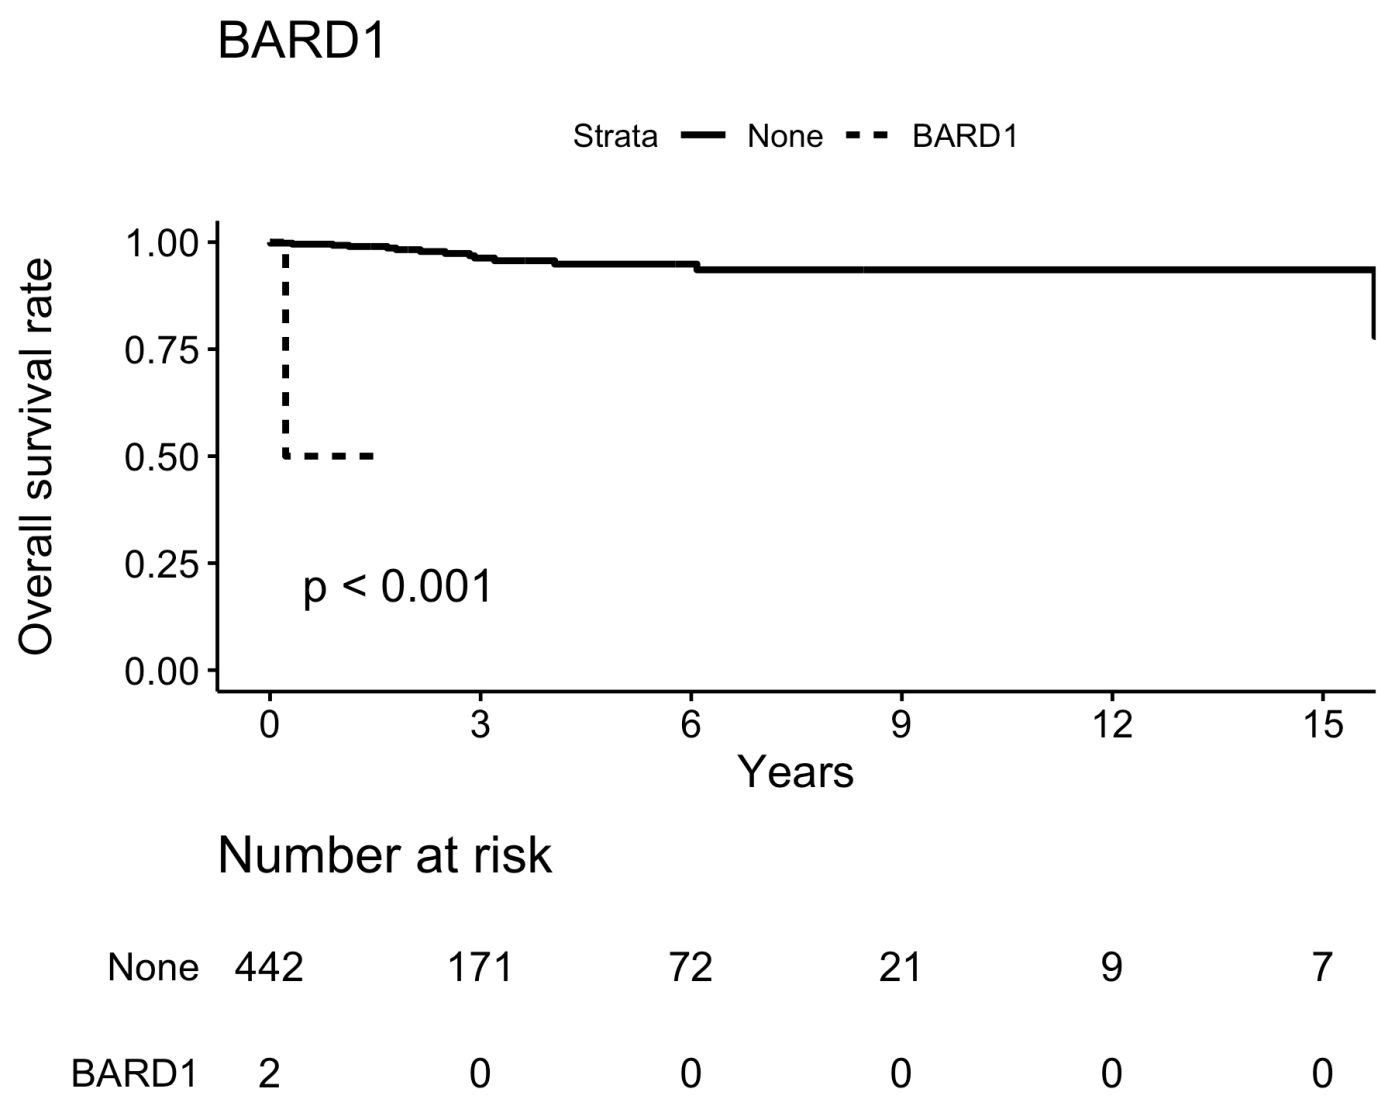

# Supplementary Figure S2

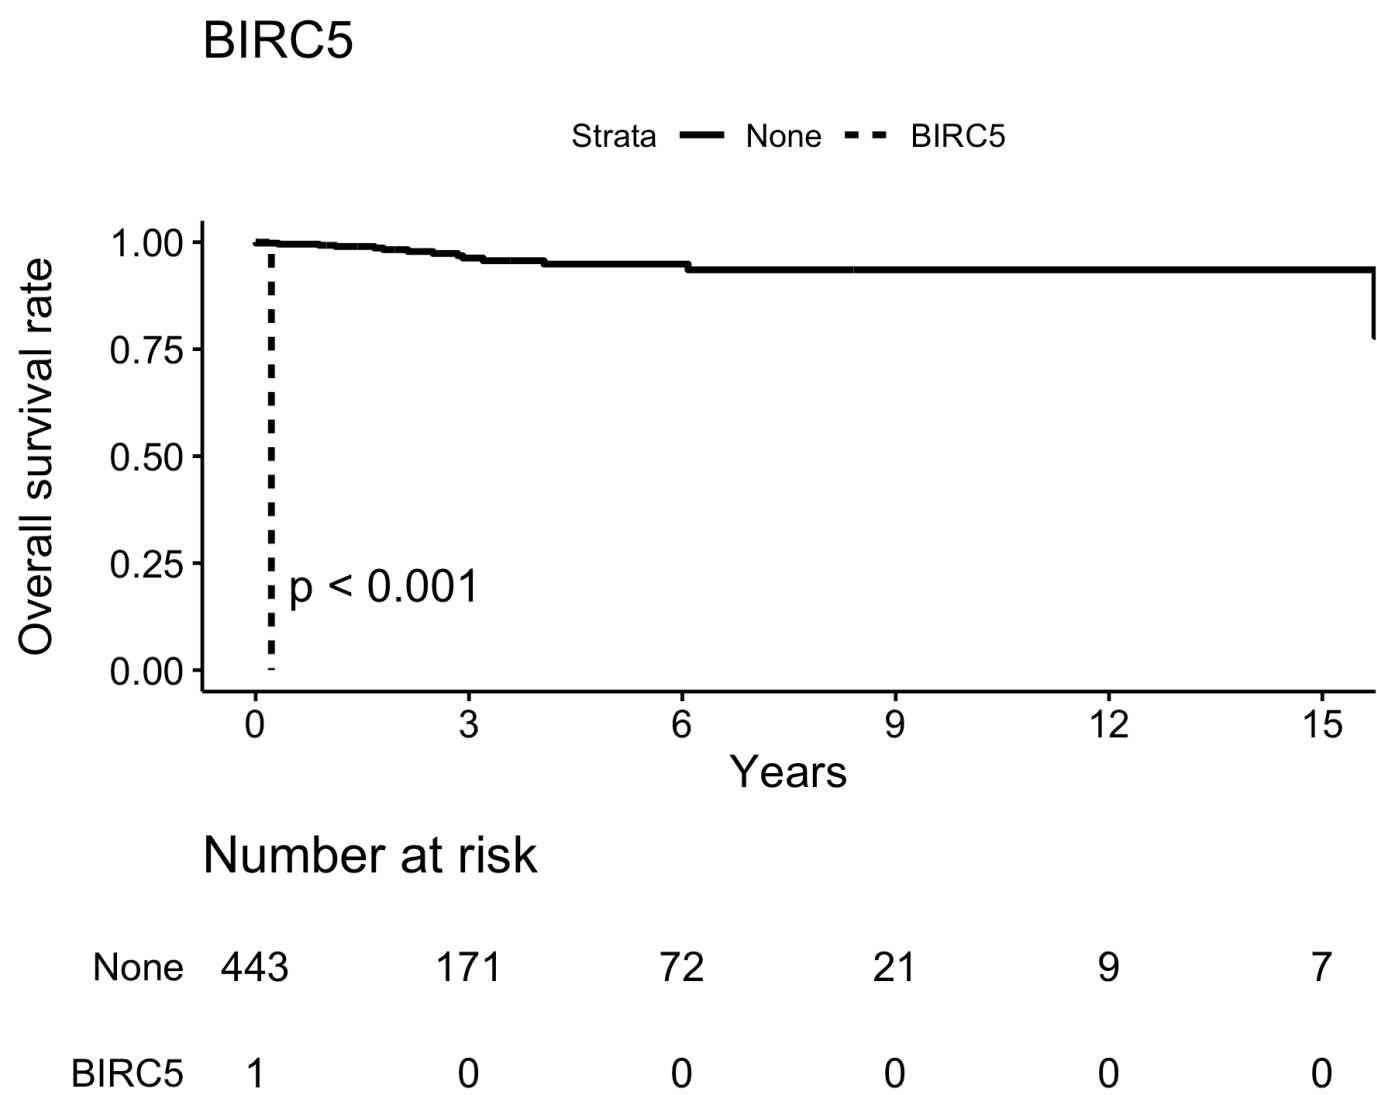

Supplementary Figure S3

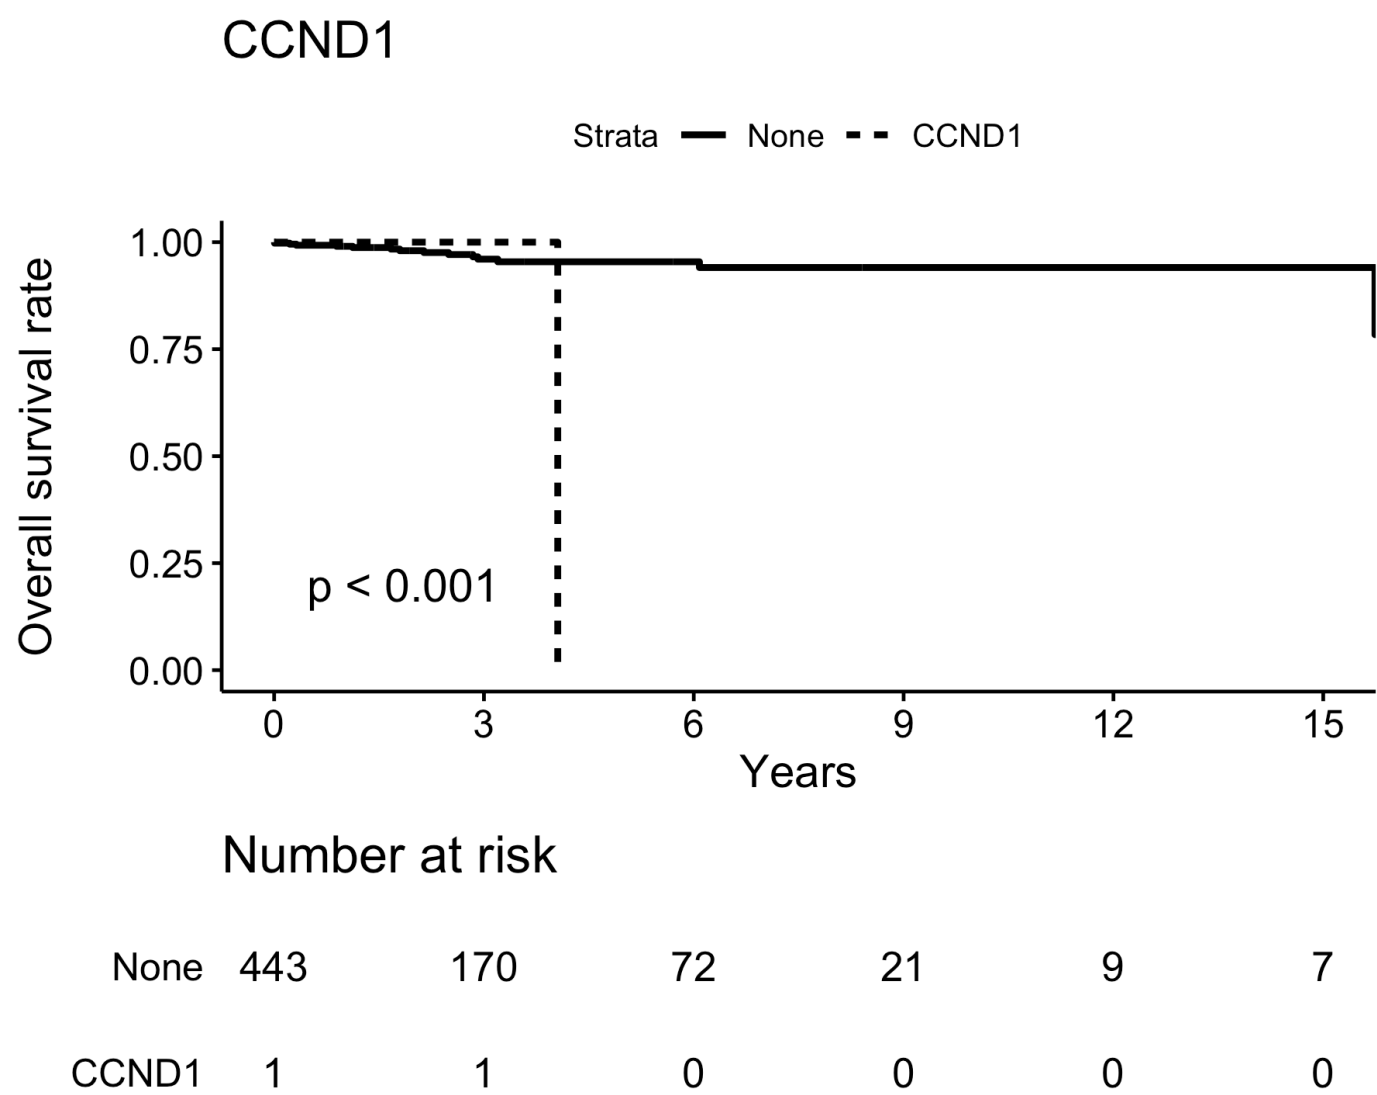

Supplementary Figure S4

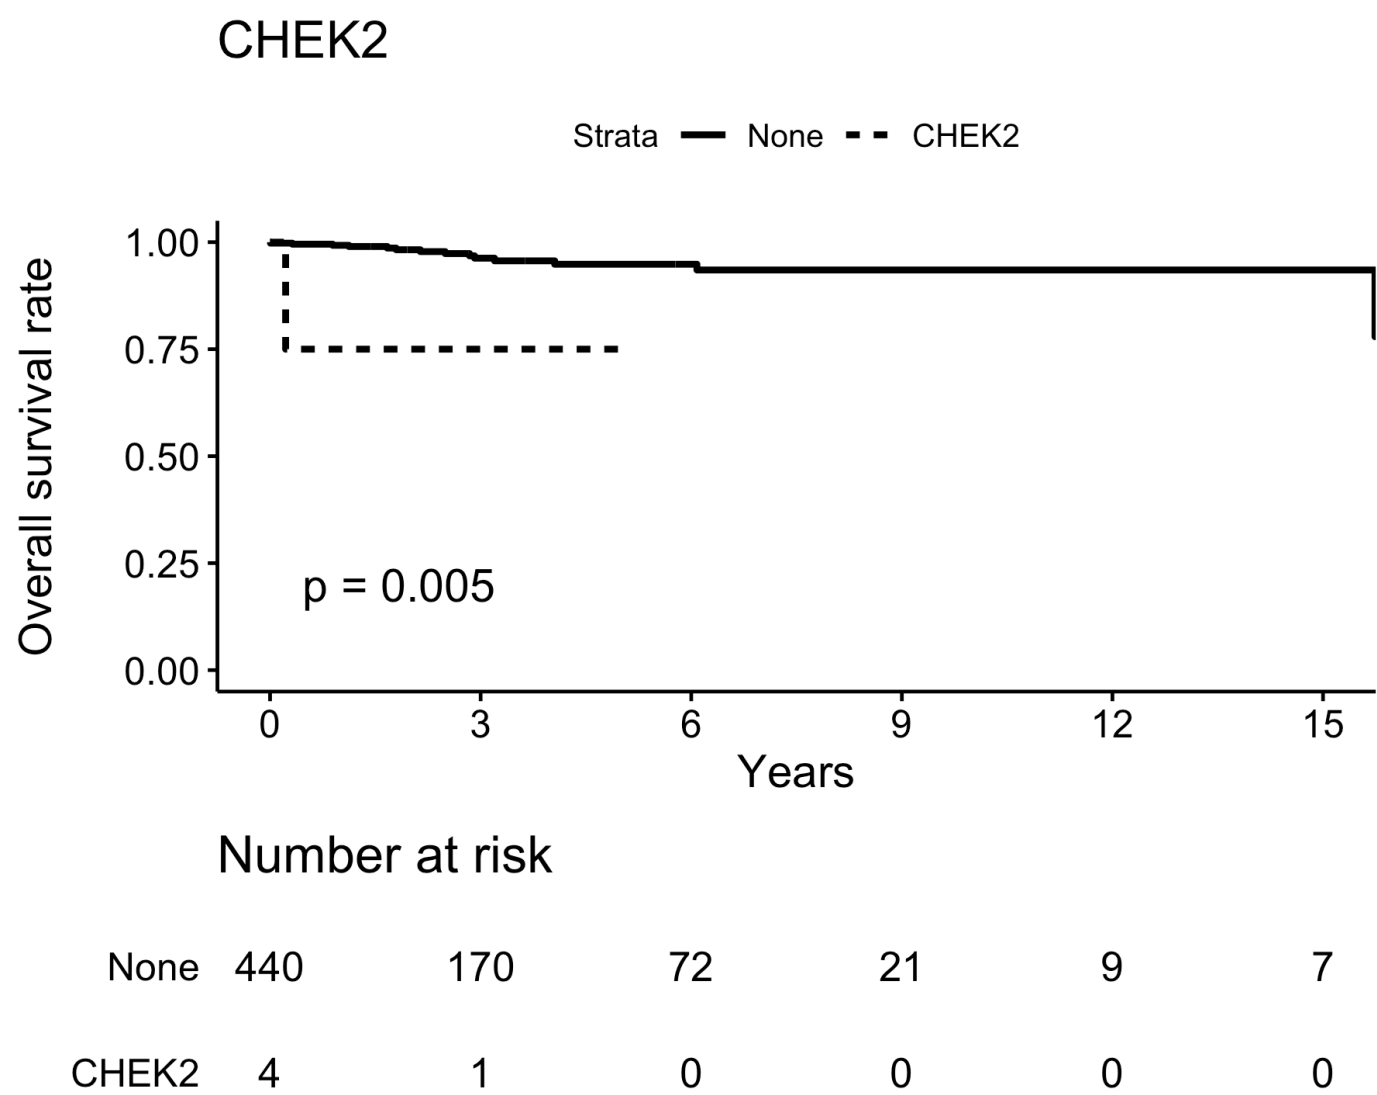

Supplementary Figure S5

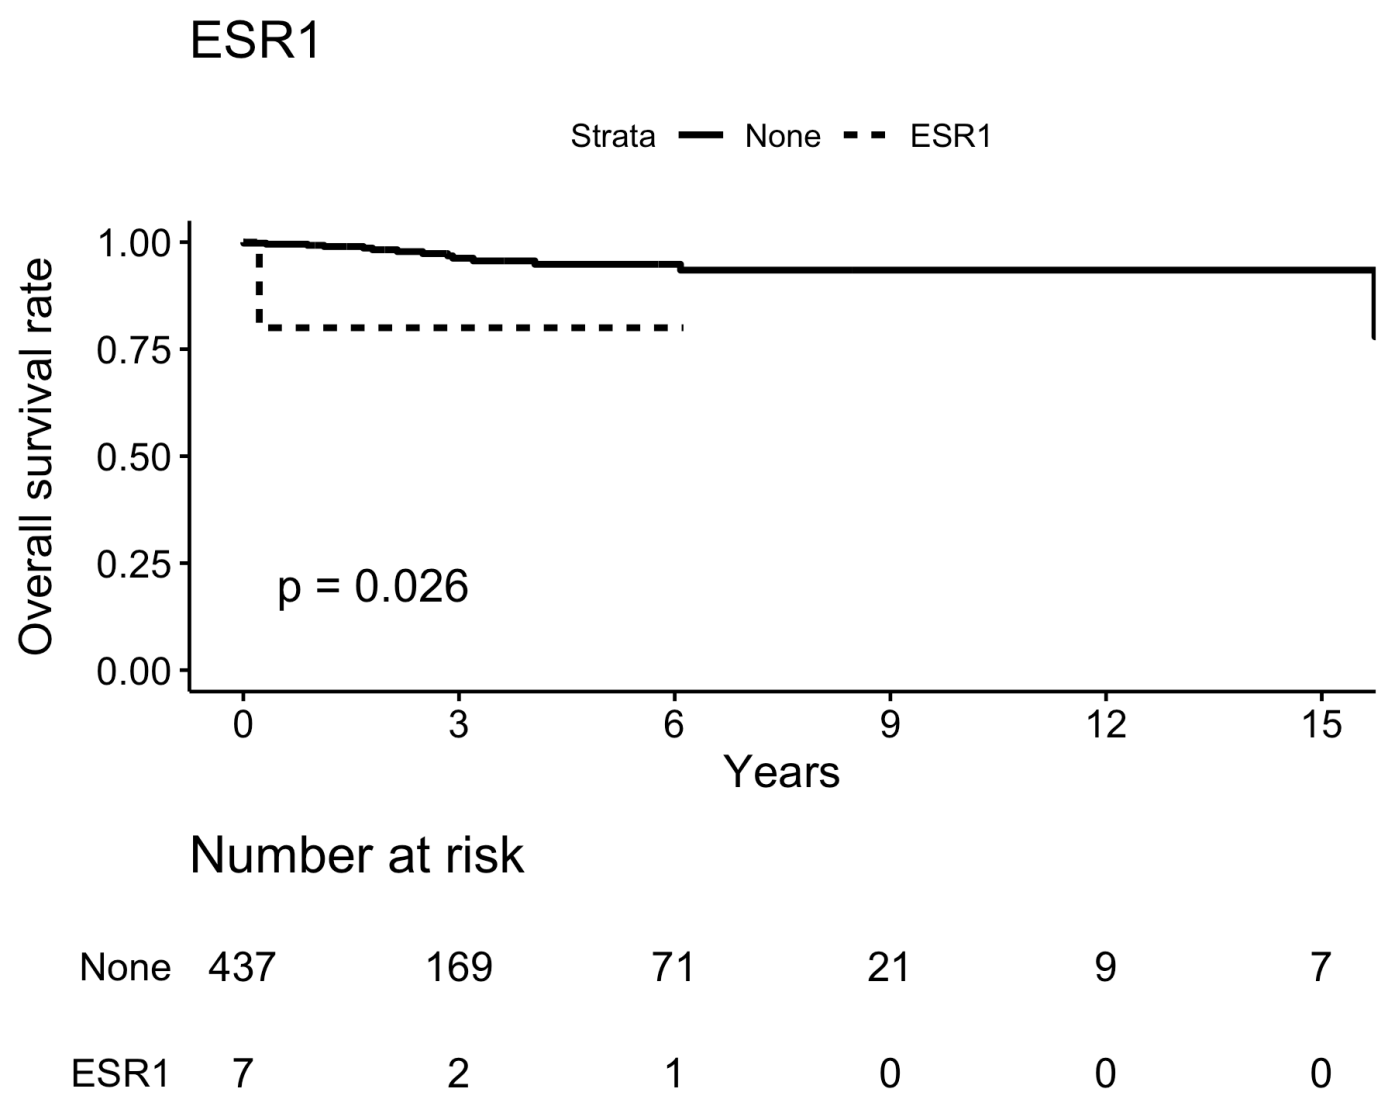

Supplementary Figure S6

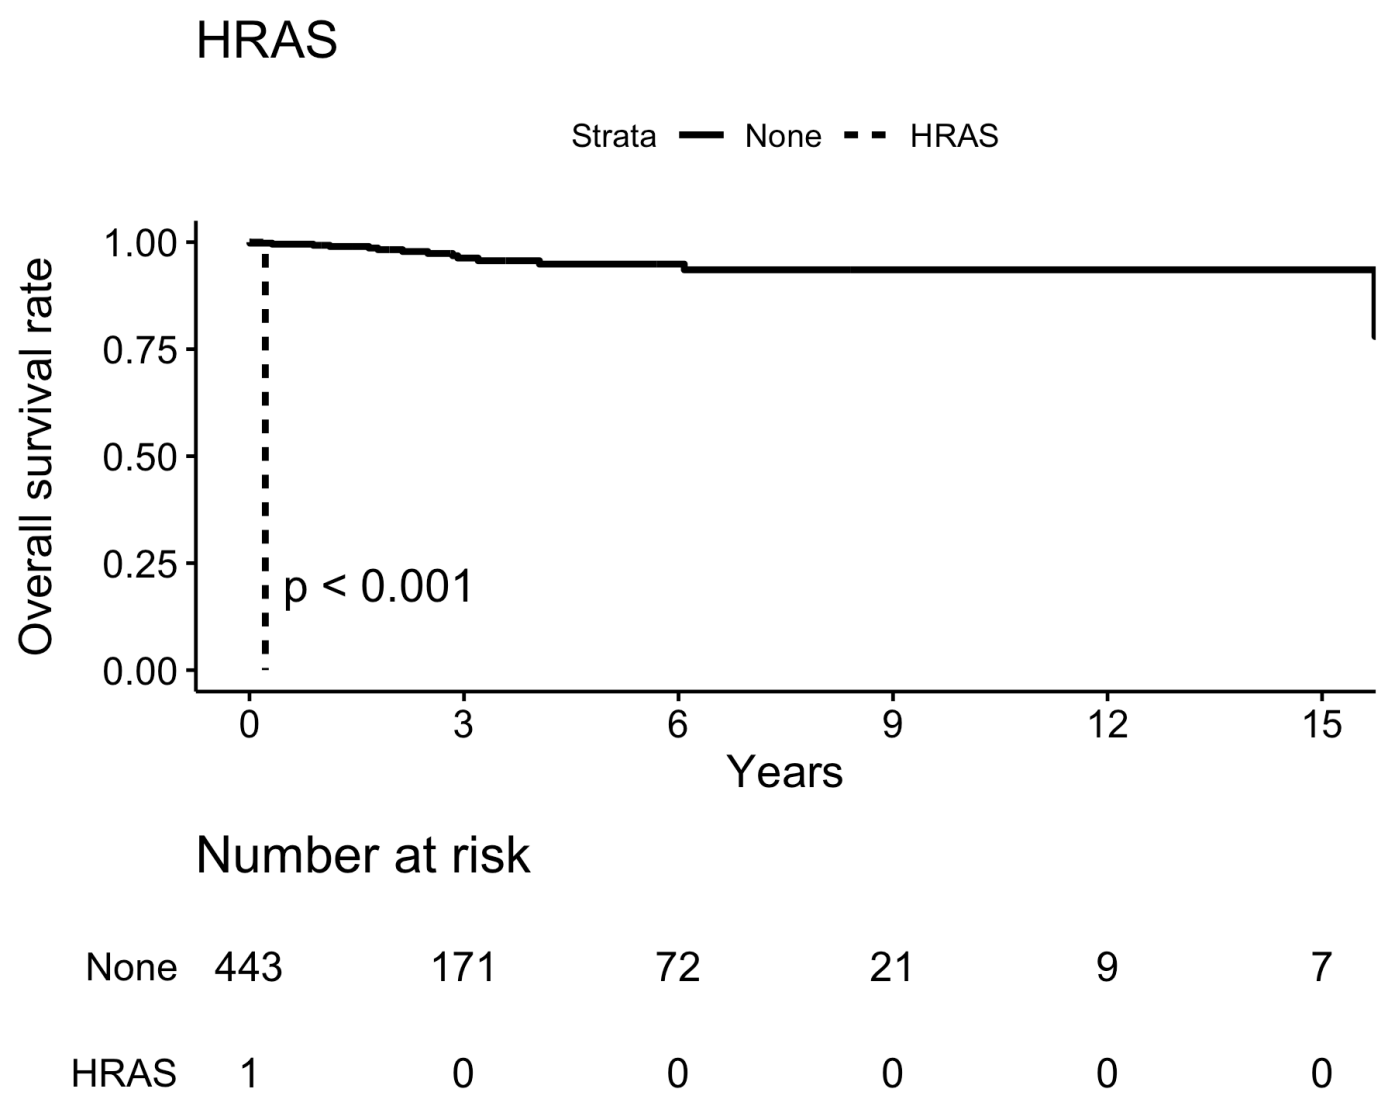

# Supplementary Figure S7

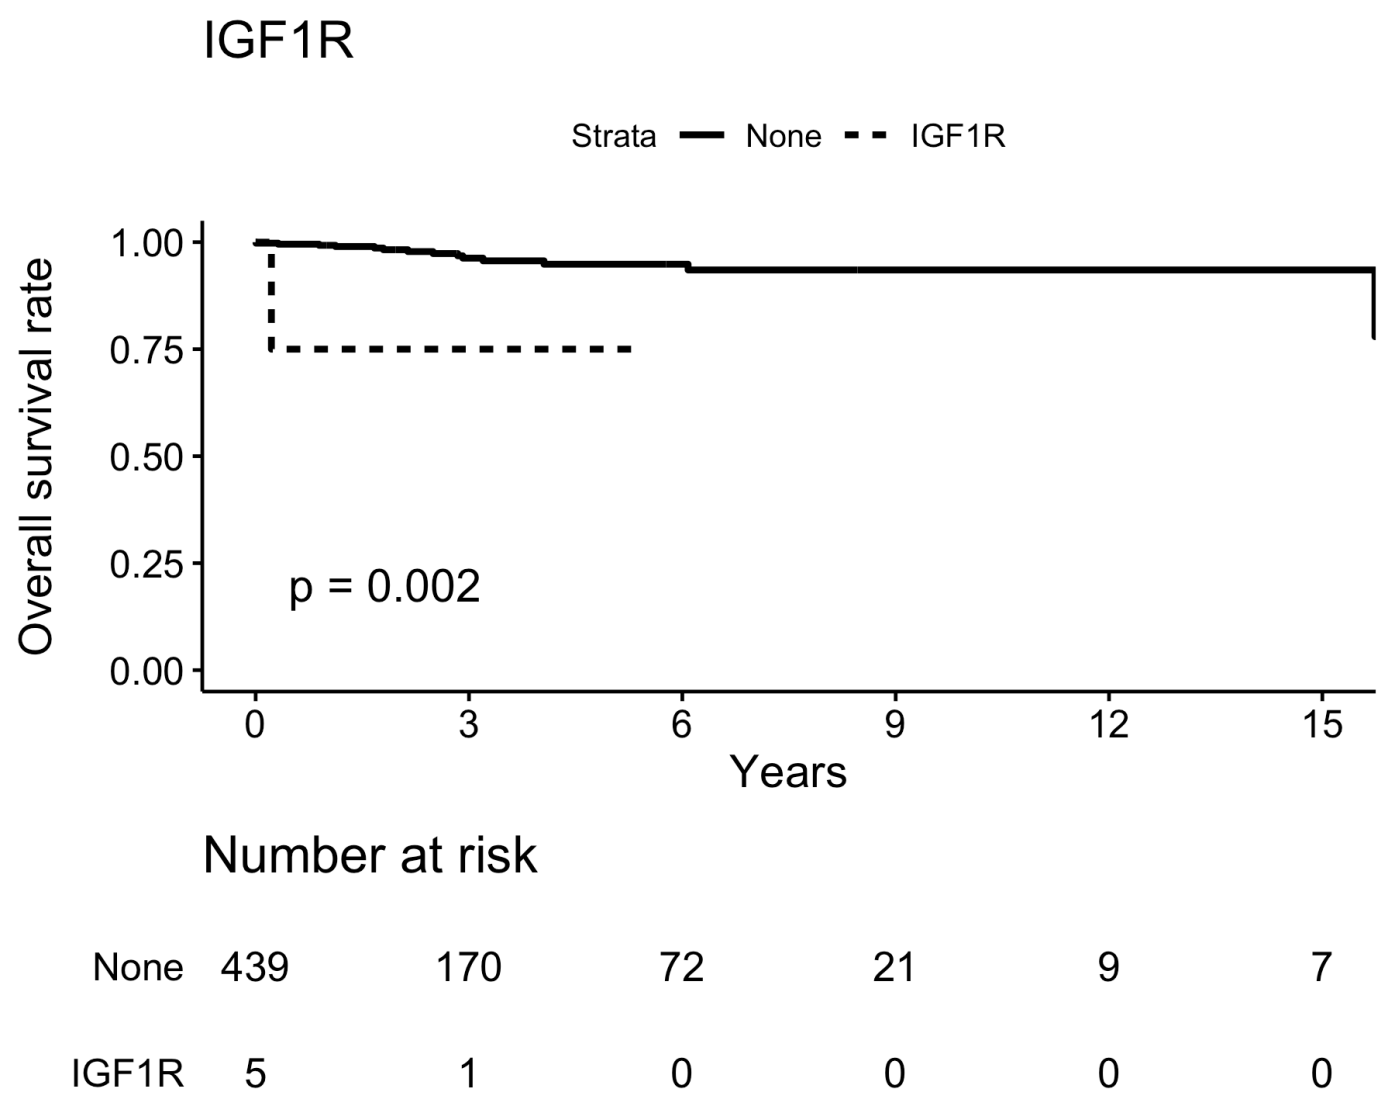

Supplementary Figure S8

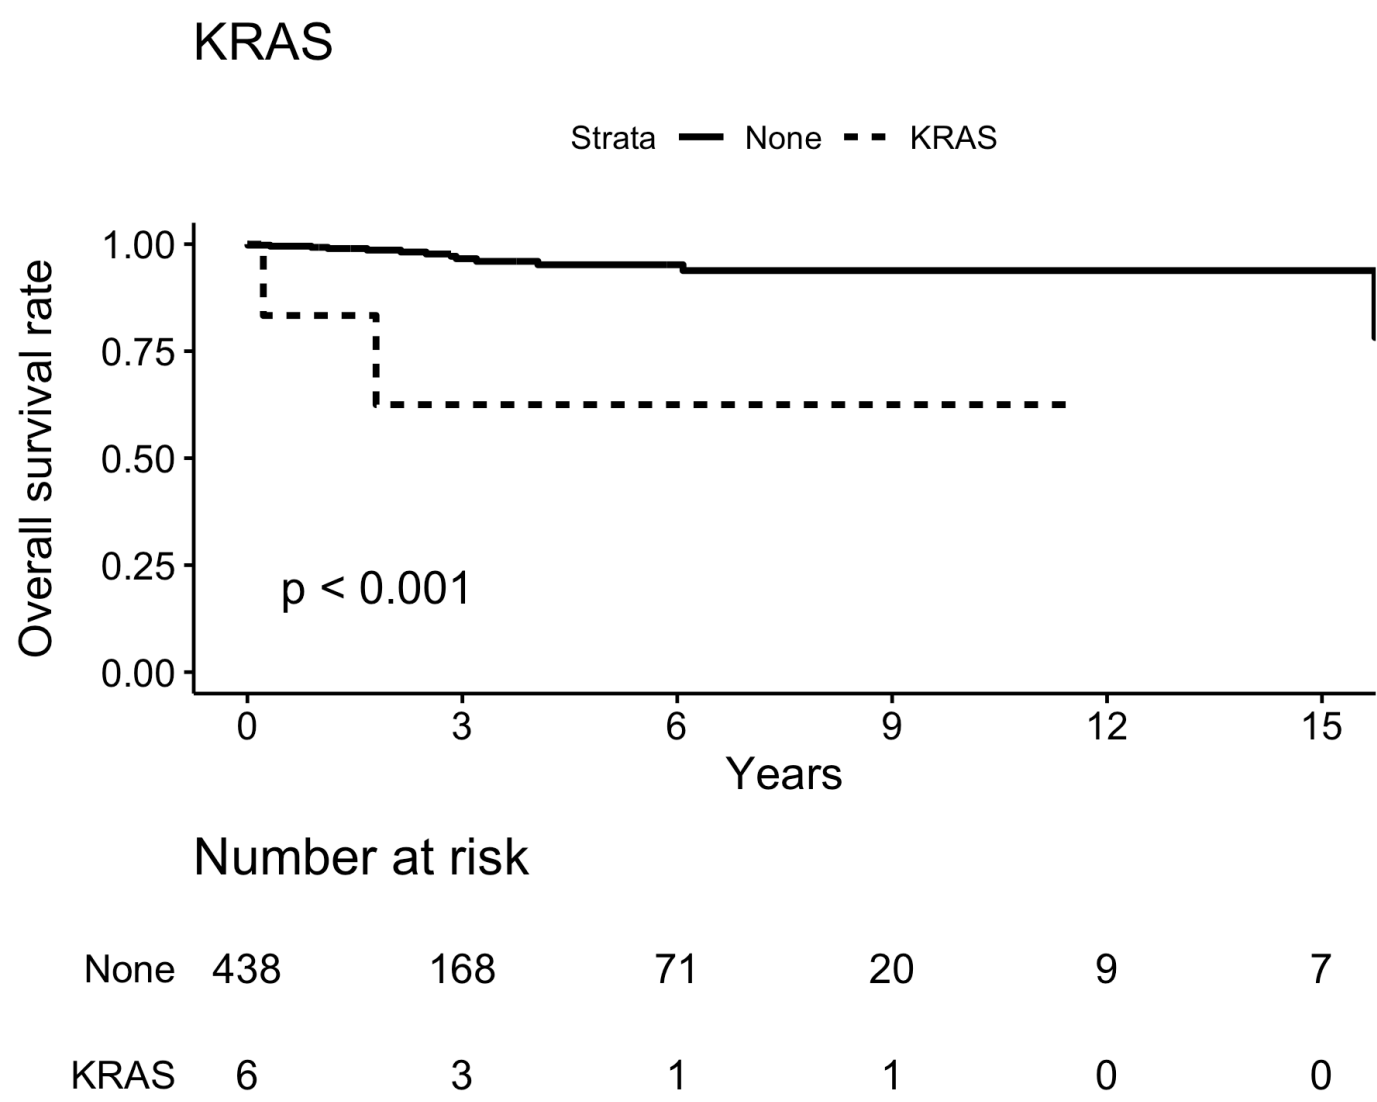



# Supplementary Figure S9

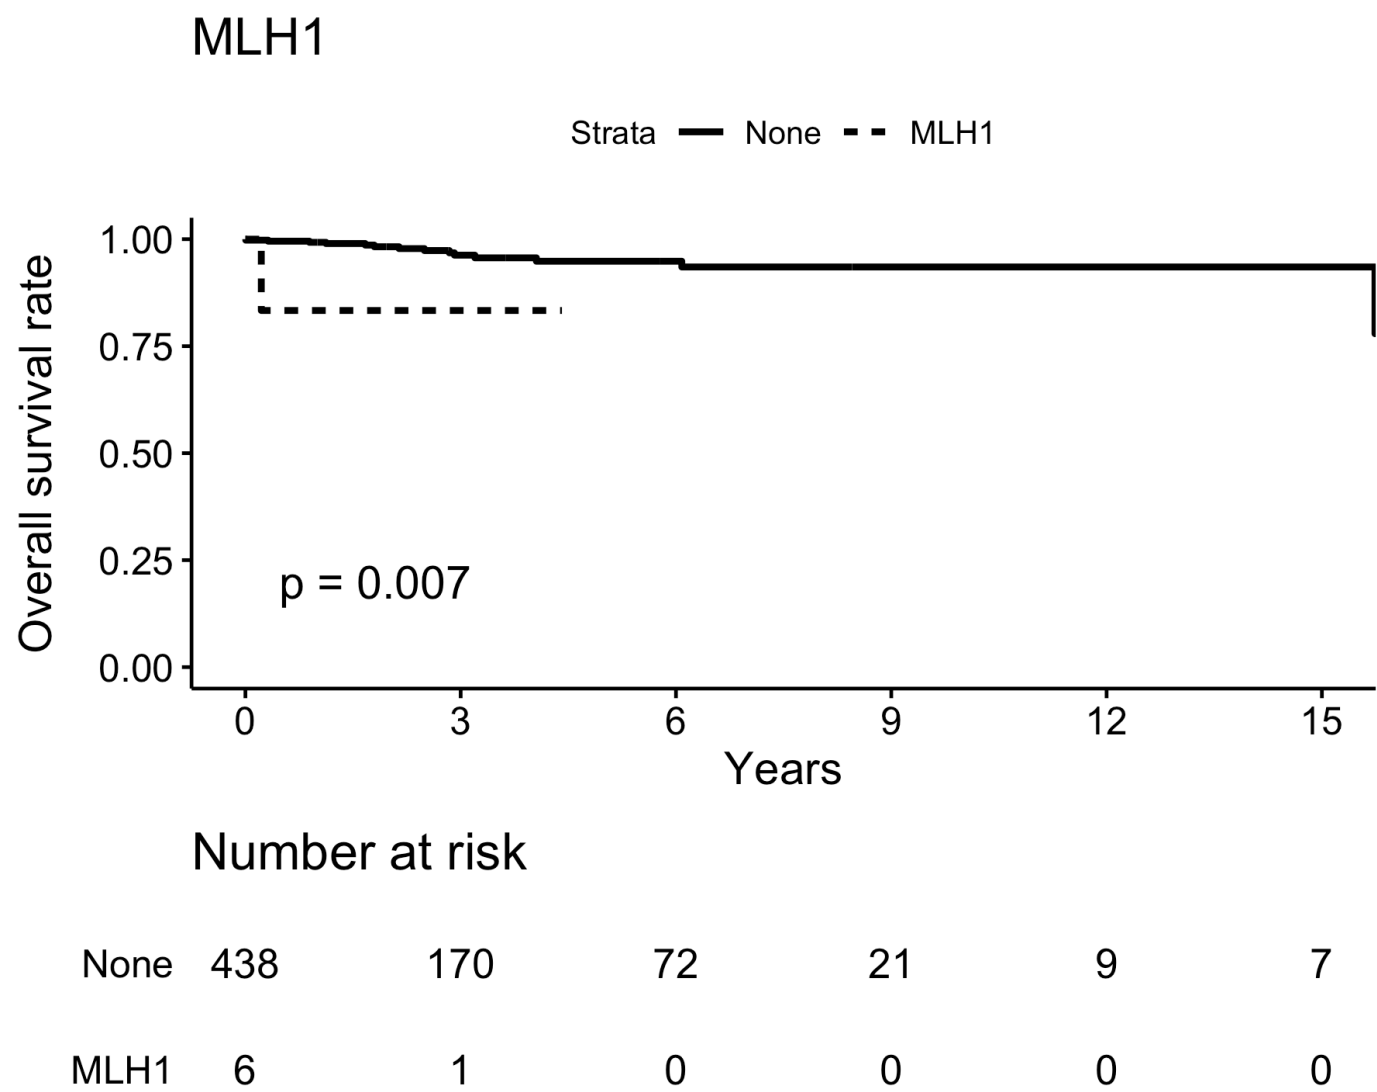

# Supplementary Figure S10

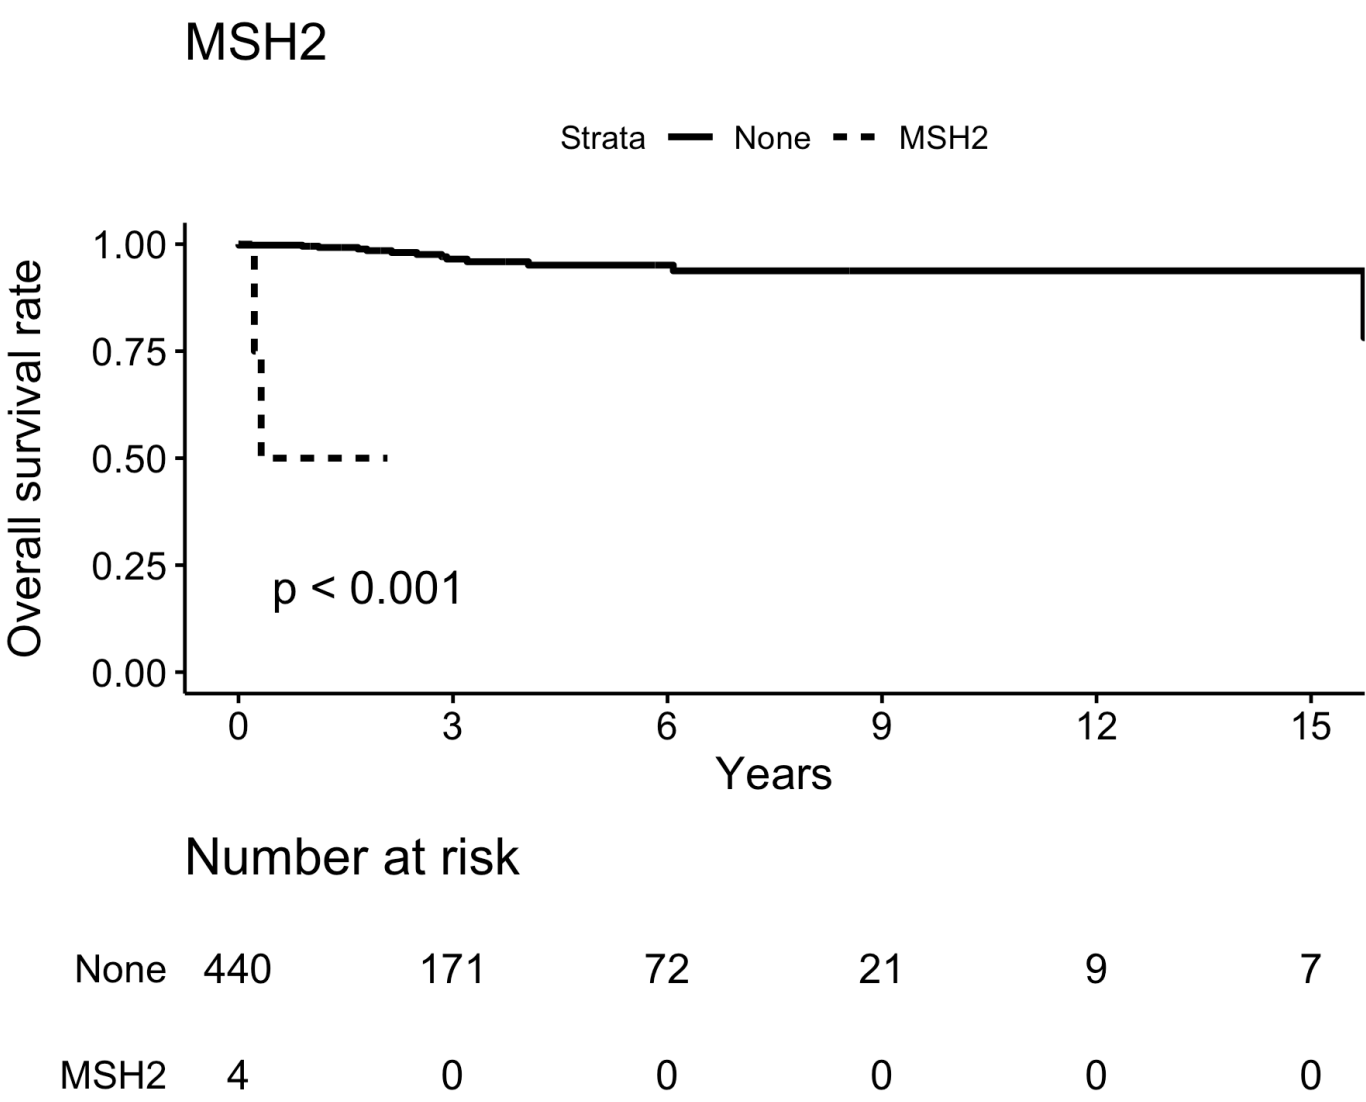

Supplementary Figure S11

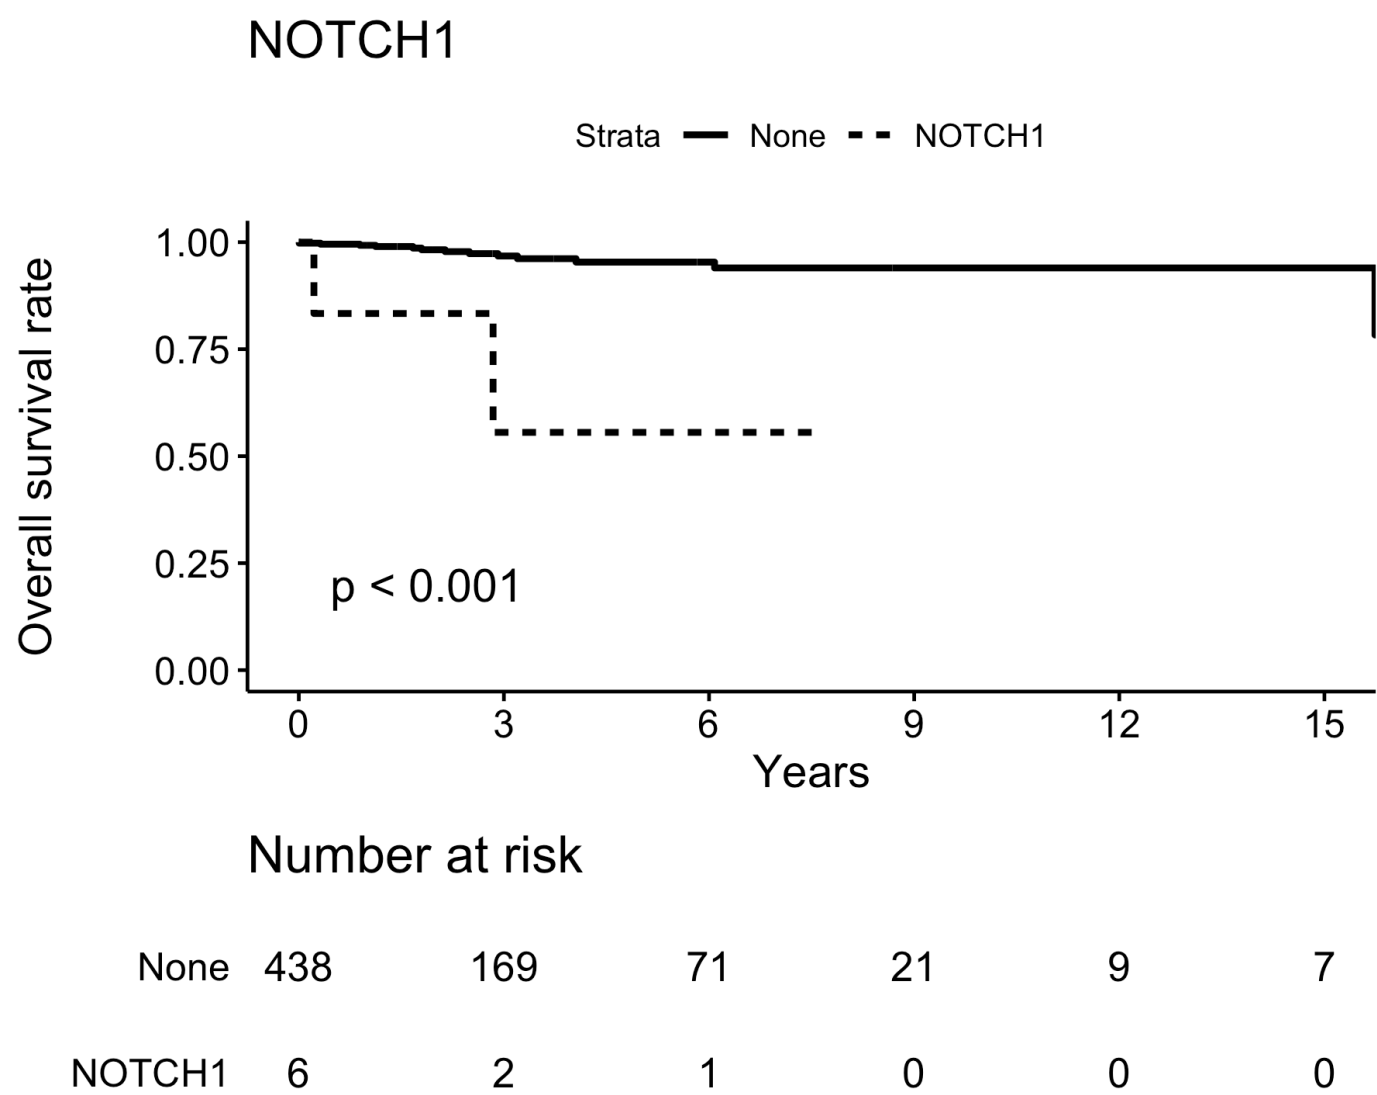

Supplementary Figure S12

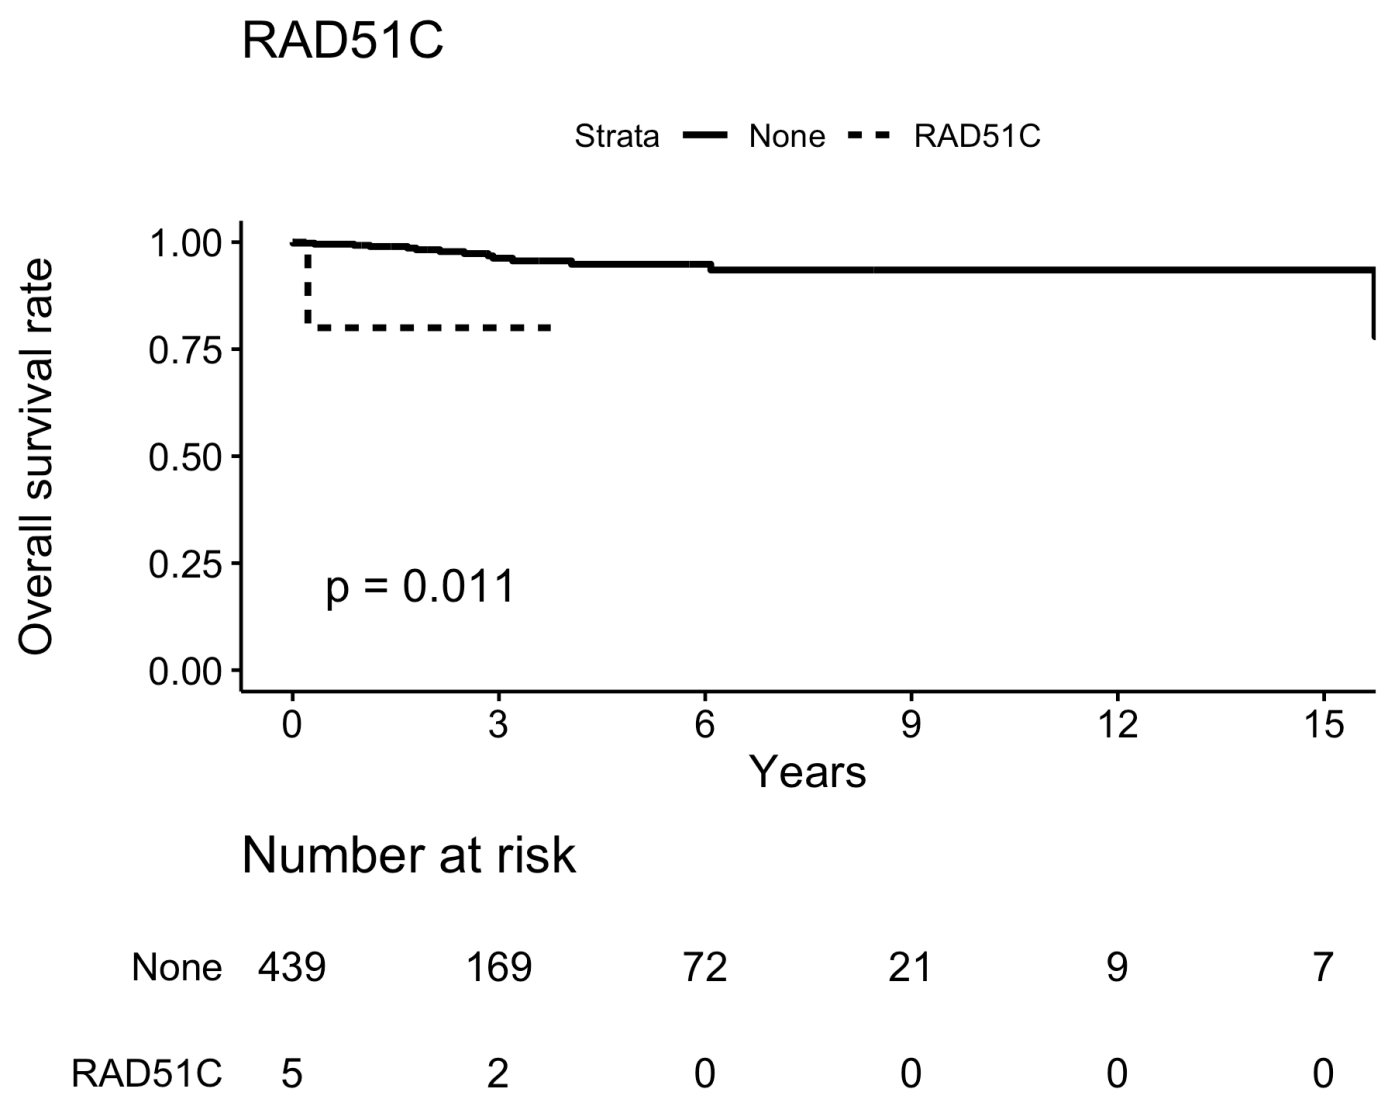

Supplementary Figure S13

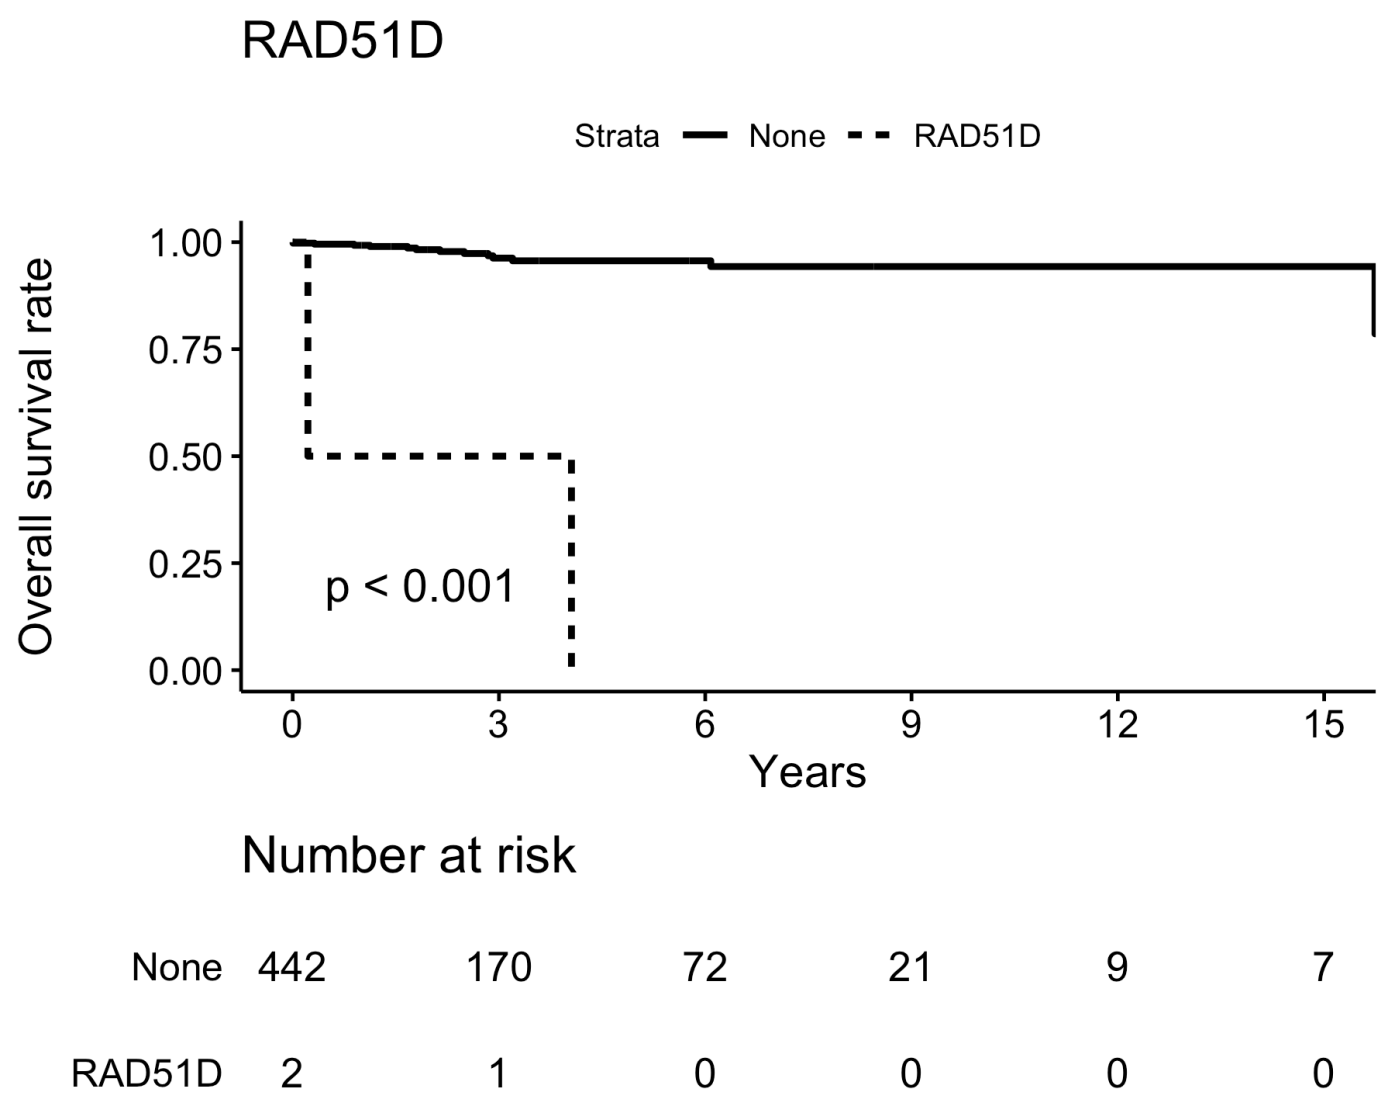

Supplementary Figure S14

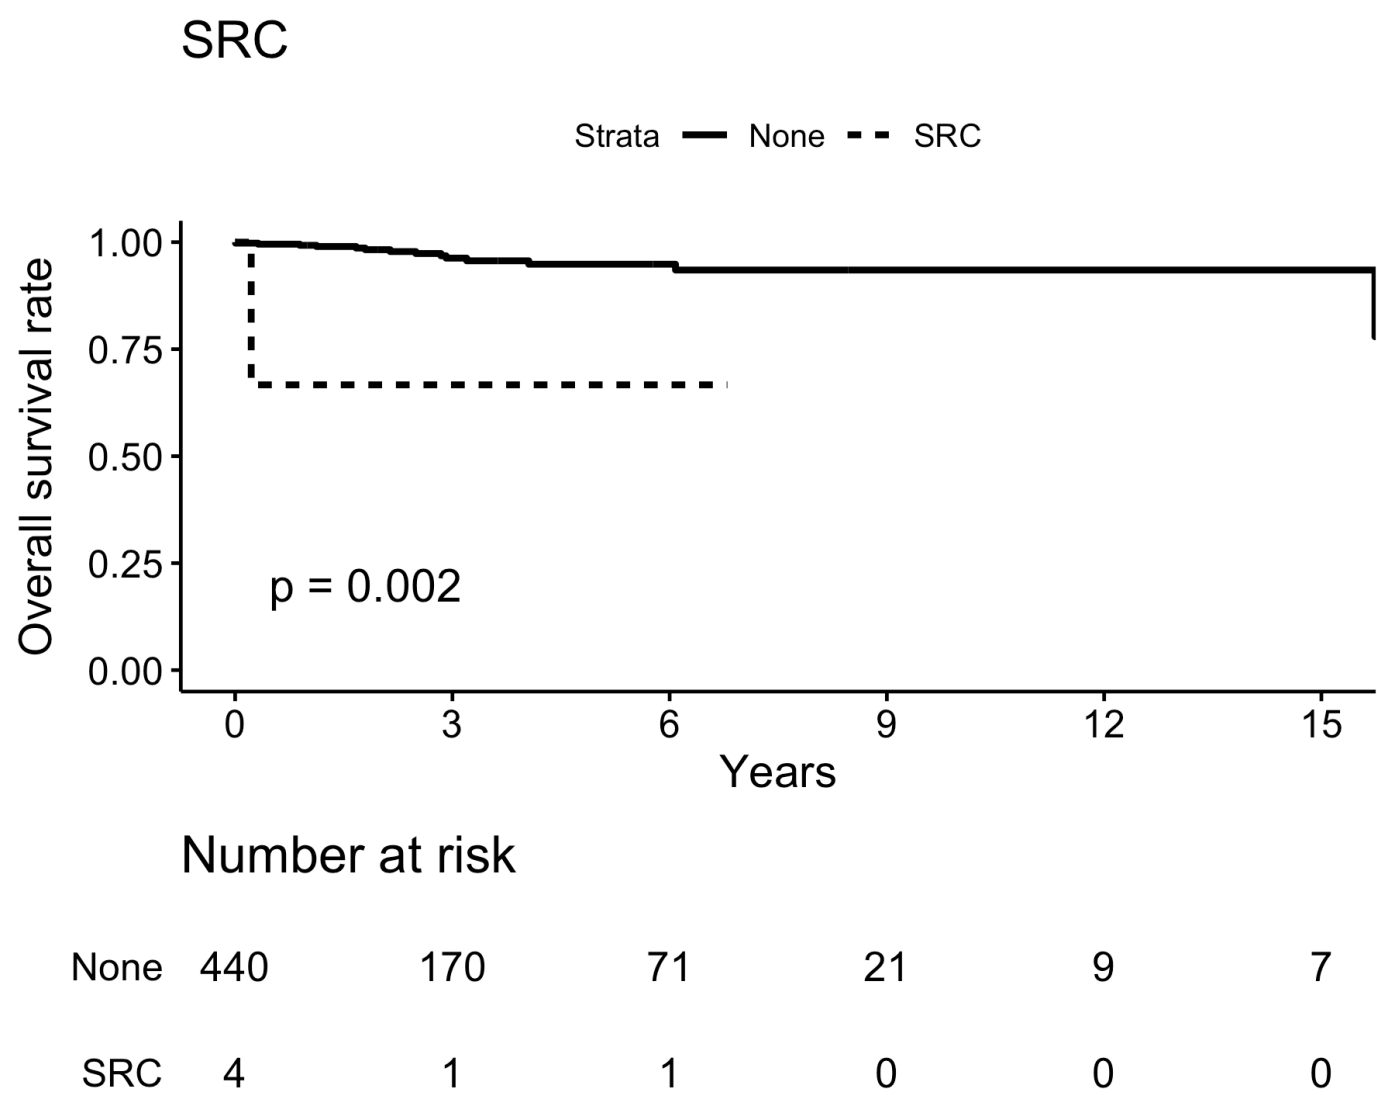

Supplement: Supplementary file 1 [file 1]
